# Supplementary material
Source: PubMed Central journal article supplement (PMC6454485)
Supplement: gay029_yang_supplementary_table_1.pdf [file gay029_yang_supplementary_table_1.pdf]

**Supplementary Table 1. DEGs in HEE cells after R1881 treatment compared to vehicle. Average of 4 RNA-seq replicas. Sorted by fold change.**

| test_id    | gene_id    | gene      | locus           | sample_1 | sample_2 | status | value_1  | value_2  | log2(fold_ch:test_stat | p_value | q_value  | significant | fold |            |
|------------|------------|-----------|-----------------|----------|----------|--------|----------|----------|------------------------|---------|----------|-------------|------|------------|
| XLOC_00920 | XLOC_00920 | MIR3177   | chr16:17557:ctr | R1881    | R1881    | OK     | 1.52204  | 18.1556  | 3.57633                | 4.65858 | 0.0002   | 0.0207686   | yes  | 11.9284113 |
| XLOC_01960 | XLOC_01960 | MIR573    | chr4:245208:ctr | R1881    | R1881    | OK     | 0.761128 | 7.80811  | 3.35876                | 4.25925 | 5.00E-05 | 0.00624511  | yes  | 10.2585861 |
| XLOC_01286 | XLOC_01286 | LINC00085 | chr19:52196:ctr | R1881    | R1881    | OK     | 3.84519  | 23.9755  | 2.64044                | 10.633  | 5.00E-05 | 0.0062451   | yes  | 6.23521799 |
| XLOC_00225 | XLOC_00225 | LEFTY1    | chr1:226073:ctr | R1881    | R1881    | OK     | 3.7092   | 10.7525  | 1.53549                | 7.5784  | 5.00E-05 | 0.00624511  | yes  | 2.89886872 |
| XLOC_02156 | XLOC_02156 | SYNGAP1   | chr6:333878:ctr | R1881    | R1881    | OK     | 3.96426  | 11.0441  | 1.47816                | 6.92918 | 5.00E-05 | 0.00624511  | yes  | 2.78593191 |
| XLOC_00192 | XLOC_00192 | ASH1L     | chr1:155305:ctr | R1881    | R1881    | OK     | 28.9063  | 67.4583  | 1.22261                | 11.7327 | 0.00035  | 0.0315725   | yes  | 2.33368526 |
| XLOC_01966 | XLOC_01966 | HOPX      | chr4:575141:ctr | R1881    | R1881    | OK     | 0.459792 | 0.953609 | 1.05242                | 1.70835 | 0.0003   | 0.0279078   | yes  | 2.0740059  |
| XLOC_00449 | XLOC_00449 | TRAPPC4   | chr11:11888:ctr | R1881    | R1881    | OK     | 30.5786  | 60.0273  | 0.973096               | 5.41896 | 5.00E-05 | 0.00624511  | yes  | 1.96304875 |
| XLOC_00713 | XLOC_00713 | VWA8      | chr13:42140:ctr | R1881    | R1881    | OK     | 7.47507  | 13.3026  | 0.831546               | 5.55368 | 0.00015  | 0.0162373   | yes  | 1.77959136 |
| XLOC_00074 | XLOC_00074 | NPR1      | chr1:153651:ctr | R1881    | R1881    | OK     | 1.51267  | 2.69032  | 0.830679               | 3.78938 | 5.00E-05 | 0.00624511  | yes  | 1.77852222 |
| XLOC_01135 | XLOC_01135 | TMEM100   | chr17:53796:ctr | R1881    | R1881    | OK     | 9.78377  | 17.1062  | 0.806058               | 4.36362 | 5.00E-05 | 0.00624511  | yes  | 1.74842753 |
| XLOC_02424 | XLOC_02424 | CCDC146   | chr7:767518:ctr | R1881    | R1881    | OK     | 44.2512  | 76.6107  | 0.791828               | 4.75449 | 5.00E-05 | 0.00624511  | yes  | 1.73126672 |
| XLOC_02582 | XLOC_02582 | LONRF1    | chr8:125794:ctr | R1881    | R1881    | OK     | 7.8184   | 13.0706  | 0.741382               | 4.42949 | 5.00E-05 | 0.00624511  | yes  | 1.67177652 |
| XLOC_02814 | XLOC_02814 | GPR64     | chrX:190074:ctr | R1881    | R1881    | OK     | 12.9147  | 21.34    | 0.724545               | 4.51689 | 5.00E-05 | 0.00624511  | yes  | 1.65237942 |
| XLOC_01116 | XLOC_01116 | STAC2     | chr17:37366:ctr | R1881    | R1881    | OK     | 2.13701  | 3.49321  | 0.708958               | 3.28182 | 5.00E-05 | 0.00624511  | yes  | 1.63462307 |
| XLOC_00689 | XLOC_00689 | SLC25A15  | chr13:41363:ctr | R1881    | R1881    | OK     | 5.85573  | 9.38698  | 0.680812               | 3.46739 | 0.0001   | 0.0112333   | yes  | 1.60304175 |
| XLOC_01820 | XLOC_01820 | EFHB      | chr3:199209:ctr | R1881    | R1881    | OK     | 0.76109  | 1.21215  | 0.671435               | 2.32521 | 5.00E-05 | 0.00624511  | yes  | 1.59265634 |
| XLOC_02484 | XLOC_02484 | STEAP4    | chr7:879057:ctr | R1881    | R1881    | OK     | 0.670009 | 1.01593  | 0.600551               | 2.21339 | 5.00E-05 | 0.00624511  | yes  | 1.51629557 |
| XLOC_01635 | XLOC_01635 | KCNB1     | chr20:47985:ctr | R1881    | R1881    | OK     | 0.768171 | 1.16456  | 0.60028                | 2.05145 | 5.00E-05 | 0.00624511  | yes  | 1.51601077 |
| XLOC_00398 | XLOC_00398 | OR7E14P   | chr11:17073:ctr | R1881    | R1881    | OK     | 2.85291  | 4.31351  | 0.596432               | 2.63913 | 5.00E-05 | 0.00624511  | yes  | 1.51197261 |
| XLOC_01944 | XLOC_01944 | TLR2      | chr4:154605:ctr | R1881    | R1881    | OK     | 11.9242  | 17.9968  | 0.593851               | 3.70009 | 5.00E-05 | 0.00624511  | yes  | 1.50927009 |
| XLOC_02454 | XLOC_02454 | CHPF2     | chr7:150929:ctr | R1881    | R1881    | OK     | 43.4267  | 65.1975  | 0.586235               | 4.70588 | 0.0004   | 0.034514    | yes  | 1.50132363 |
| XLOC_00360 | XLOC_00360 | GPAM      | chr10:11390:ctr | R1881    | R1881    | OK     | 6.06655  | 9.10459  | 0.585717               | 3.61433 | 5.00E-05 | 0.00624511  | yes  | 1.50078467 |
| XLOC_01424 | XLOC_01424 | IL1R2     | chr2:102608:ctr | R1881    | R1881    | OK     | 5.44901  | 8.14349  | 0.579654               | 2.56957 | 5.00E-05 | 0.00624511  | yes  | 1.49449078 |
| XLOC_02141 | XLOC_02141 | SLC17A4   | chr6:257549:ctr | R1881    | R1881    | OK     | 0.89105  | 1.32389  | 0.571204               | 1.8374  | 0.00045  | 0.0379125   | yes  | 1.485763   |
| XLOC_02085 | XLOC_02085 | LIX1      | chr5:964275:ctr | R1881    | R1881    | OK     | 0.895628 | 1.30491  | 0.542979               | 2.20607 | 5.00E-05 | 0.00624511  | yes  | 1.45697791 |
| XLOC_00447 | XLOC_00447 | ZBTB16    | chr11:11393:ctr | R1881    | R1881    | OK     | 2.9717   | 4.21206  | 0.503241               | 1.77424 | 0.0003   | 0.0279078   | yes  | 1.41739415 |
| XLOC_02654 | XLOC_02654 | PSAT1     | chr9:809120:ctr | R1881    | R1881    | OK     | 24.111   | 34.1235  | 0.501074               | 3.13947 | 5.00E-05 | 0.00624511  | yes  | 1.41526675 |
| XLOC_01025 | XLOC_01025 | SERPINF2  | chr17:16461:ctr | R1881    | R1881    | OK     | 3.06786  | 4.31976  | 0.493718               | 2.05204 | 5.00E-05 | 0.00624511  | yes  | 1.40806897 |
| XLOC_02086 | XLOC_02086 | SLCO4C1   | chr5:101569:ctr | R1881    | R1881    | OK     | 7.54743  | 10.5651  | 0.485254               | 3.19903 | 5.00E-05 | 0.00624511  | yes  | 1.3998323  |
| XLOC_02462 | XLOC_02462 | SOSTDC1   | chr7:165011:ctr | R1881    | R1881    | OK     | 3.74834  | 5.24607  | 0.484986               | 2.42501 | 5.00E-05 | 0.00624511  | yes  | 1.39957228 |
| XLOC_01872 | XLOC_01872 | GMNC      | chr3:190570:ctr | R1881    | R1881    | OK     | 1.39528  | 1.94283  | 0.477607               | 2.17409 | 0.00025  | 0.0246699   | yes  | 1.39243212 |
| XLOC_02647 | XLOC_02647 | HRCT1     | chr9:359061:ctr | R1881    | R1881    | OK     | 7.01676  | 9.64559  | 0.459064               | 2.40507 | 5.00E-05 | 0.00624511  | yes  | 1.37464968 |
| XLOC_00287 | XLOC_00287 | RASSF4    | chr10:45455:ctr | R1881    | R1881    | OK     | 13.6019  | 18.6657  | 0.456585               | 2.30589 | 5.00E-05 | 0.00624511  | yes  | 1.37228963 |
| XLOC_00761 | XLOC_00761 | LINC00617 | chr14:96342:ctr | R1881    | R1881    | OK     | 6.9182   | 9.37224  | 0.437998               | 2.44687 | 5.00E-05 | 0.00624511  | yes  | 1.3547231  |
| XLOC_01597 | XLOC_01597 | VSTM2L    | chr20:36531:ctr | R1881    | R1881    | OK     | 14.8143  | 20.0021  | 0.433163               | 2.37428 | 5.00E-05 | 0.00624511  | yes  | 1.35019053 |
| XLOC_00019 | XLOC_00019 | NCMAP     | chr1:248825:ctr | R1881    | R1881    | OK     | 21.6778  | 28.9426  | 0.416978               | 2.7337  | 5.00E-05 | 0.00624511  | yes  | 1.33512794 |
| XLOC_02564 | XLOC_02564 | BAALC     | chr8:104145:ctr | R1881    | R1881    | OK     | 2.962    | 3.94071  | 0.411884               | 2.03166 | 0.0004   | 0.034514    | yes  | 1.33042206 |
| XLOC_02199 | XLOC_02199 | SLC35B3   | chr6:841196:ctr | R1881    | R1881    | OK     | 16.5169  | 21.7984  | 0.40028                | 2.20579 | 0.0001   | 0.0112333   | yes  | 1.31976403 |
| XLOC_02497 | XLOC_02497 | TSPAN12   | chr7:120427:ctr | R1881    | R1881    | OK     | 10.9113  | 14.3702  | 0.397261               | 2.59341 | 5.00E-05 | 0.00624511  | yes  | 1.31700516 |
| XLOC_00065 | XLOC_00065 | TXNIP     | chr1:145438:ctr | R1881    | R1881    | OK     | 19.0886  | 24.9109  | 0.384064               | 2.50512 | 5.00E-05 | 0.00624511  | yes  | 1.30501284 |
| XLOC_02402 | XLOC_02402 | MIOS      | chr7:758874:ctr | R1881    | R1881    | OK     | 18.9945  | 24.7507  | 0.381886               | 2.14355 | 5.00E-05 | 0.00624511  | yes  | 1.30304418 |

|            |            |                 |             |     |       |    |         |         |           |          |          |            |     |            |
|------------|------------|-----------------|-------------|-----|-------|----|---------|---------|-----------|----------|----------|------------|-----|------------|
| XLOC_02233 | XLOC_02233 | CNR1            | chr6:888495 | ctr | R1881 | OK | 5.40435 | 6.95692 | 0.364329  | 2.20978  | 5.00E-05 | 0.00624511 | yes | 1.28728277 |
| XLOC_00947 | XLOC_00947 | MT1M            | chr16:56666 | ctr | R1881 | OK | 37.5126 | 48.276  | 0.36393   | 3.17329  | 0.0005   | 0.0419272  | yes | 1.2869268  |
| XLOC_00583 | XLOC_00583 | <b>SOC52</b>    | chr12:93931 | ctr | R1881 | OK | 10.3795 | 13.2027 | 0.347089  | 1.91911  | 0.0001   | 0.0112333  | yes | 1.27199147 |
| XLOC_01940 | XLOC_01940 | PCDH10          | chr4:134070 | ctr | R1881 | OK | 3.12952 | 3.96576 | 0.341655  | 1.7149   | 0.00035  | 0.0315725  | yes | 1.26720945 |
| XLOC_02082 | XLOC_02082 | ANKRD34B        | chr5:798525 | ctr | R1881 | OK | 7.3871  | 9.35871 | 0.341302  | 1.95463  | 0.0002   | 0.0207686  | yes | 1.26689943 |
| XLOC_02487 | XLOC_02487 | ASNS            | chr7:974814 | ctr | R1881 | OK | 13.5795 | 17.1434 | 0.336221  | 1.9198   | 0.00025  | 0.0246699  | yes | 1.26244541 |
| XLOC_00280 | XLOC_00280 | PTER            | chr10:16478 | ctr | R1881 | OK | 9.20877 | 11.6191 | 0.335422  | 2.10256  | 0.0002   | 0.0207686  | yes | 1.26174643 |
| XLOC_02662 | XLOC_02662 | <b>ZNF189</b>   | chr9:104161 | ctr | R1881 | OK | 6.85266 | 8.62279 | 0.331491  | 1.82983  | 0.00015  | 0.0162373  | yes | 1.25831315 |
| XLOC_02583 | XLOC_02583 | MTUS1           | chr8:175013 | ctr | R1881 | OK | 4.45937 | 5.59751 | 0.327943  | 1.7607   | 0.00025  | 0.0246699  | yes | 1.2552224  |
| XLOC_02218 | XLOC_02218 | <b>FKBP5</b>    | chr6:355411 | ctr | R1881 | OK | 57.2971 | 71.6337 | 0.322177  | 2.09658  | 0.00015  | 0.0162373  | yes | 1.25021568 |
| XLOC_00709 | XLOC_00709 | SLC46A3         | chr13:29274 | ctr | R1881 | OK | 6.75292 | 8.44095 | 0.321895  | 1.86617  | 0.00045  | 0.0379125  | yes | 1.24997133 |
| XLOC_01960 | XLOC_01960 | <b>PPARGC1A</b> | chr4:237936 | ctr | R1881 | OK | 2.87845 | 3.59537 | 0.32085   | 1.77461  | 0.0004   | 0.034514   | yes | 1.24906625 |
| XLOC_01068 | XLOC_01068 | PCTP            | chr17:53828 | ctr | R1881 | OK | 11.1215 | 13.8621 | 0.317798  | 1.7377   | 0.00055  | 0.0446525  | yes | 1.24642666 |
| XLOC_00947 | XLOC_00947 | <b>MT1E</b>     | chr16:56659 | ctr | R1881 | OK | 924.793 | 1135.06 | 0.295564  | 2.8742   | 0.00055  | 0.0446525  | yes | 1.2273647  |
| XLOC_02703 | XLOC_02703 | ALDH1A1         | chr9:755155 | ctr | R1881 | OK | 86.7337 | 106.263 | 0.292973  | 2.01422  | 0.0001   | 0.0112333  | yes | 1.2251624  |
| XLOC_01701 | XLOC_01701 | TIMP3           | chr22:32908 | ctr | R1881 | OK | 22.4671 | 18.5896 | -0.273316 | -1.7111  | 0.00045  | 0.0379125  | yes | 0.82741556 |
| XLOC_02486 | XLOC_02486 | PDK4            | chr7:952128 | ctr | R1881 | OK | 64.1646 | 52.9106 | -0.27822  | -1.87703 | 0.00055  | 0.0446525  | yes | 0.82460779 |
| XLOC_02614 | XLOC_02614 | ST3GAL1         | chr8:134467 | ctr | R1881 | OK | 25.7785 | 21.2246 | -0.280434 | -1.69121 | 0.0004   | 0.034514   | yes | 0.8233433  |
| XLOC_01970 | XLOC_01970 | CXCL2           | chr4:749627 | ctr | R1881 | OK | 179.592 | 146.14  | -0.29737  | -2.20418 | 0.0001   | 0.0112333  | yes | 0.81373446 |
| XLOC_00396 | XLOC_00396 | WEE1            | chr11:95952 | ctr | R1881 | OK | 20.1388 | 16.3592 | -0.299872 | -1.88852 | 0.00055  | 0.0446525  | yes | 0.81232447 |
| XLOC_02220 | XLOC_02220 | KCNK5           | chr6:391562 | ctr | R1881 | OK | 9.51564 | 7.71977 | -0.301742 | -1.662   | 0.0004   | 0.034514   | yes | 0.81127222 |
| XLOC_00169 | XLOC_00169 | BCAR3           | chr1:940273 | ctr | R1881 | OK | 30.595  | 24.759  | -0.305341 | -1.86985 | 0.0004   | 0.034514   | yes | 0.80925092 |
| XLOC_00227 | XLOC_00227 | PGBD5           | chr1:230451 | ctr | R1881 | OK | 48.6494 | 39.3504 | -0.306045 | -1.79192 | 0.0002   | 0.0207686  | yes | 0.80885612 |
| XLOC_00284 | XLOC_00284 | MAP3K8          | chr10:30722 | ctr | R1881 | OK | 12.0733 | 9.75178 | -0.308084 | -1.74106 | 0.00055  | 0.0446525  | yes | 0.80771375 |
| XLOC_02614 | XLOC_02614 | NDRG1           | chr8:134249 | ctr | R1881 | OK | 41.6379 | 33.6305 | -0.308125 | -1.86557 | 0.0001   | 0.0112333  | yes | 0.80769079 |
| XLOC_02039 | XLOC_02039 | SLC12A2         | chr5:127419 | ctr | R1881 | OK | 20.9181 | 16.893  | -0.308319 | -2.08249 | 0.0001   | 0.0112333  | yes | 0.80758219 |
| XLOC_01704 | XLOC_01704 | MAFF            | chr22:38597 | ctr | R1881 | OK | 20.3851 | 16.4574 | -0.308774 | -1.74844 | 0.00025  | 0.0246699  | yes | 0.80732753 |
| XLOC_01351 | XLOC_01351 | KCNN4           | chr19:44270 | ctr | R1881 | OK | 17.1317 | 13.8302 | -0.30885  | -1.86761 | 0.0006   | 0.048273   | yes | 0.80728501 |
| XLOC_01724 | XLOC_01724 | LIF             | chr22:30636 | ctr | R1881 | OK | 99.9594 | 80.3269 | -0.315459 | -1.84751 | 5.00E-05 | 0.00624511 | yes | 0.80359528 |
| XLOC_01528 | XLOC_01528 | MREG            | chr2:216807 | ctr | R1881 | OK | 10.9282 | 8.77107 | -0.317234 | -1.99174 | 0.0001   | 0.0112333  | yes | 0.8026072  |
| XLOC_01622 | XLOC_01622 | THBD            | chr20:23026 | ctr | R1881 | OK | 9.54849 | 7.65936 | -0.318049 | -1.95727 | 0.0003   | 0.0279078  | yes | 0.80215392 |
| XLOC_02541 | XLOC_02541 | SLC7A2          | chr8:173544 | ctr | R1881 | OK | 29.9562 | 23.9381 | -0.323546 | -2.15137 | 5.00E-05 | 0.00624511 | yes | 0.79910335 |
| XLOC_00721 | XLOC_00721 | SPRY2           | chr13:80910 | ctr | R1881 | OK | 44.3241 | 35.3611 | -0.325929 | -1.97762 | 5.00E-05 | 0.00624511 | yes | 0.7977845  |
| XLOC_00495 | XLOC_00495 | EHD1            | chr11:64619 | ctr | R1881 | OK | 38.3924 | 30.6088 | -0.326872 | -1.94869 | 5.00E-05 | 0.00624511 | yes | 0.79726321 |
| XLOC_00058 | XLOC_00058 | CSF1            | chr1:110453 | ctr | R1881 | OK | 28.1956 | 22.4778 | -0.326968 | -1.87928 | 5.00E-05 | 0.00624511 | yes | 0.79721016 |
| XLOC_00885 | XLOC_00885 | CA12            | chr15:63612 | ctr | R1881 | OK | 175.351 | 139.621 | -0.328733 | -1.81513 | 0.00025  | 0.0246699  | yes | 0.79623545 |
| XLOC_01977 | XLOC_01977 | DDIT4L          | chr4:101106 | ctr | R1881 | OK | 42.077  | 33.4721 | -0.330075 | -2.15607 | 5.00E-05 | 0.00624511 | yes | 0.79549513 |
| XLOC_02106 | XLOC_02106 | SH3PXD2B        | chr5:171760 | ctr | R1881 | OK | 25.3152 | 20.128  | -0.330798 | -2.0116  | 5.00E-05 | 0.00624511 | yes | 0.79509657 |
| XLOC_00522 | XLOC_00522 | CLMP            | chr11:12294 | ctr | R1881 | OK | 9.82143 | 7.79055 | -0.334208 | -1.8233  | 5.00E-05 | 0.00624511 | yes | 0.79321947 |
| XLOC_02225 | XLOC_02225 | TNFRSF21        | chr6:471992 | ctr | R1881 | OK | 32.3549 | 25.65   | -0.335029 | -2.18966 | 5.00E-05 | 0.00624511 | yes | 0.7927682  |
| XLOC_00589 | XLOC_00589 | BTBD11          | chr12:10771 | ctr | R1881 | OK | 9.18213 | 7.24524 | -0.341795 | -1.90898 | 5.00E-05 | 0.00624511 | yes | 0.78905895 |
| XLOC_00220 | XLOC_00220 | PLXNA2          | chr1:208195 | ctr | R1881 | OK | 3.41629 | 2.69376 | -0.342808 | -1.69406 | 0.0004   | 0.034514   | yes | 0.78850511 |
| XLOC_02134 | XLOC_02134 | FOXQ1           | chr6:131267 | ctr | R1881 | OK | 18.2767 | 14.3608 | -0.347873 | -2.28229 | 5.00E-05 | 0.00624511 | yes | 0.78574168 |
| XLOC_00556 | XLOC_00556 | PDE3A           | chr12:20522 | ctr | R1881 | OK | 2.94885 | 2.30828 | -0.353336 | -1.92073 | 0.00015  | 0.0162373  | yes | 0.78277197 |

|            |            |           |                 |       |    |         |          |           |          |          |            |     |            |
|------------|------------|-----------|-----------------|-------|----|---------|----------|-----------|----------|----------|------------|-----|------------|
| XLOC_02106 | XLOC_02106 | DUSP1     | chr5:172193 ctr | R1881 | OK | 118.996 | 93.0841  | -0.354312 | -2.16318 | 5.00E-05 | 0.00624511 | yes | 0.78224259 |
| XLOC_01464 | XLOC_01464 | CXCR7     | chr2:237476 ctr | R1881 | OK | 14.4671 | 11.298   | -0.356713 | -1.94257 | 0.0003   | 0.0279078  | yes | 0.78094183 |
| XLOC_01461 | XLOC_01461 | B3GNT7    | chr2:232260 ctr | R1881 | OK | 7.38148 | 5.75375  | -0.359409 | -2.00823 | 0.0003   | 0.0279078  | yes | 0.77948383 |
| XLOC_01082 | XLOC_01082 | C1QTNF1   | chr17:77015 ctr | R1881 | OK | 9.03839 | 7.03236  | -0.362056 | -1.86241 | 5.00E-05 | 0.00624511 | yes | 0.77805498 |
| XLOC_01927 | XLOC_01927 | EREG      | chr4:752308 ctr | R1881 | OK | 23.0251 | 17.8827  | -0.364646 | -2.55975 | 5.00E-05 | 0.00624511 | yes | 0.77665942 |
| XLOC_01478 | XLOC_01478 | XDH       | chr2:315555 ctr | R1881 | OK | 35.7552 | 27.7628  | -0.365003 | -2.13908 | 5.00E-05 | 0.00624511 | yes | 0.77646726 |
| XLOC_01187 | XLOC_01187 | CABLES1   | chr18:20714 ctr | R1881 | OK | 14.6666 | 11.3703  | -0.367263 | -2.14533 | 5.00E-05 | 0.00624511 | yes | 0.77525187 |
| XLOC_01825 | XLOC_01825 | CDCP1     | chr3:451236 ctr | R1881 | OK | 35.3955 | 27.4116  | -0.368782 | -2.06955 | 5.00E-05 | 0.00624511 | yes | 0.77443604 |
| XLOC_02140 | XLOC_02140 | ID4       | chr6:198376 ctr | R1881 | OK | 12.2819 | 9.49176  | -0.371781 | -2.43874 | 5.00E-05 | 0.00624511 | yes | 0.77282786 |
| XLOC_01794 | XLOC_01794 | EPHB1     | chr3:134514 ctr | R1881 | OK | 12.3624 | 9.504    | -0.379352 | -2.28549 | 5.00E-05 | 0.00624511 | yes | 0.76878282 |
| XLOC_01351 | XLOC_01351 | PLAUR     | chr19:44150 ctr | R1881 | OK | 147.159 | 112.937  | -0.381858 | -2.24807 | 5.00E-05 | 0.00624511 | yes | 0.76744858 |
| XLOC_00787 | XLOC_00787 | NFKBIA    | chr14:35869 ctr | R1881 | OK | 115.663 | 88.5347  | -0.385617 | -2.29613 | 5.00E-05 | 0.00624511 | yes | 0.76545157 |
| XLOC_00628 | XLOC_00628 | KRT6A     | chr12:52880 ctr | R1881 | OK | 14.1312 | 10.7697  | -0.391913 | -2.25379 | 5.00E-05 | 0.00624511 | yes | 0.76211837 |
| XLOC_01584 | XLOC_01584 | SMOX      | chr20:41294 ctr | R1881 | OK | 89.9472 | 68.3315  | -0.396528 | -2.35228 | 5.00E-05 | 0.00624511 | yes | 0.75968435 |
| XLOC_01528 | XLOC_01528 | IGFBP5    | chr2:217536 ctr | R1881 | OK | 33.4242 | 25.3206  | -0.400582 | -2.42126 | 5.00E-05 | 0.00624511 | yes | 0.75755262 |
| XLOC_01498 | XLOC_01498 | NEURL3    | chr2:971633 ctr | R1881 | OK | 5.89901 | 4.46561  | -0.401615 | -1.6814  | 0.00045  | 0.0379125  | yes | 0.75701039 |
| XLOC_00297 | XLOC_00297 | PLAU      | chr10:75669 ctr | R1881 | OK | 879.848 | 662.414  | -0.40952  | -1.85543 | 0.00025  | 0.0246699  | yes | 0.75287382 |
| XLOC_01141 | XLOC_01141 | ERN1      | chr17:62116 ctr | R1881 | OK | 4.86021 | 3.65623  | -0.410659 | -2.12465 | 5.00E-05 | 0.00624511 | yes | 0.75227967 |
| XLOC_02096 | XLOC_02096 | HBEGF     | chr5:139712 ctr | R1881 | OK | 19.9209 | 14.9347  | -0.415617 | -2.60039 | 5.00E-05 | 0.00624511 | yes | 0.7496988  |
| XLOC_01460 | XLOC_01460 | CCL20     | chr2:228678 ctr | R1881 | OK | 142.277 | 106.524  | -0.417516 | -2.57582 | 5.00E-05 | 0.00624511 | yes | 0.74871263 |
| XLOC_00851 | XLOC_00851 | ARIH1     | chr15:72765 ctr | R1881 | OK | 21.1224 | 15.7524  | -0.423205 | -2.8414  | 0.0001   | 0.0112333  | yes | 0.74576604 |
| XLOC_01609 | XLOC_01609 | SLCO4A1   | chr20:61273 ctr | R1881 | OK | 27.6149 | 20.573   | -0.42469  | -2.27213 | 5.00E-05 | 0.00624511 | yes | 0.7449988  |
| XLOC_00715 | XLOC_00715 | KIAA0226L | chr13:46916 ctr | R1881 | OK | 4.95831 | 3.6926   | -0.42521  | -2.19977 | 5.00E-05 | 0.00624511 | yes | 0.74473032 |
| XLOC_00641 | XLOC_00641 | PHLDA1    | chr12:76419 ctr | R1881 | OK | 31.4399 | 23.4137  | -0.425242 | -2.75135 | 5.00E-05 | 0.00624511 | yes | 0.7447138  |
| XLOC_01930 | XLOC_01930 | AGPAT9    | chr4:844570 ctr | R1881 | OK | 9.98777 | 7.42949  | -0.426899 | -2.36808 | 5.00E-05 | 0.00624511 | yes | 0.74385896 |
| XLOC_01970 | XLOC_01970 | CXCL3     | chr4:749023 ctr | R1881 | OK | 77.4739 | 57.5607  | -0.428627 | -3.17698 | 5.00E-05 | 0.00624511 | yes | 0.74296853 |
| XLOC_00478 | XLOC_00478 | LMO2      | chr11:33880 ctr | R1881 | OK | 4.222   | 3.13672  | -0.428666 | -1.70705 | 0.0004   | 0.034514   | yes | 0.74294844 |
| XLOC_01236 | XLOC_01236 | ICAM1     | chr19:10381 ctr | R1881 | OK | 27.1608 | 20.1583  | -0.430152 | -2.69009 | 5.00E-05 | 0.00624511 | yes | 0.74218359 |
| XLOC_01619 | XLOC_01619 | JAG1      | chr20:10606 ctr | R1881 | OK | 25.2445 | 18.5511  | -0.444466 | -2.52457 | 5.00E-05 | 0.00624511 | yes | 0.73485627 |
| XLOC_02793 | XLOC_02793 | SLC6A14   | chrX:115567 ctr | R1881 | OK | 17.1551 | 12.5834  | -0.447111 | -3.11008 | 5.00E-05 | 0.00624511 | yes | 0.73351023 |
| XLOC_02189 | XLOC_02189 | AKAP12    | chr6:151561 ctr | R1881 | OK | 20.5193 | 15.0409  | -0.448098 | -2.65105 | 5.00E-05 | 0.00624511 | yes | 0.73300859 |
| XLOC_01840 | XLOC_01840 | ADAMTS9   | chr3:645013 ctr | R1881 | OK | 60.327  | 44.2187  | -0.448147 | -2.68709 | 5.00E-05 | 0.00624511 | yes | 0.73298369 |
| XLOC_01069 | XLOC_01069 | NOG       | chr17:54671 ctr | R1881 | OK | 3.53254 | 2.58675  | -0.449564 | -2.02153 | 0.0003   | 0.0279078  | yes | 0.73226411 |
| XLOC_00359 | XLOC_00359 | ITPRIP    | chr10:10606 ctr | R1881 | OK | 7.97494 | 5.81524  | -0.455634 | -2.62041 | 5.00E-05 | 0.00624511 | yes | 0.72918966 |
| XLOC_00314 | XLOC_00314 | DUSP5     | chr10:11225 ctr | R1881 | OK | 25.2836 | 18.3644  | -0.461291 | -2.72203 | 5.00E-05 | 0.00624511 | yes | 0.726336   |
| XLOC_00146 | XLOC_00146 | PHC2      | chr1:337884 ctr | R1881 | OK | 256.413 | 186.205  | -0.461582 | -4.20838 | 0.0002   | 0.0207686  | yes | 0.72618951 |
| XLOC_02447 | XLOC_02447 | MTRNR2L6  | chr7:142374 ctr | R1881 | OK | 7.23893 | 5.25281  | -0.462687 | -2.46887 | 0.00025  | 0.0246699  | yes | 0.72563352 |
| XLOC_01679 | XLOC_01679 | SIK1      | chr21:44834 ctr | R1881 | OK | 15.7759 | 11.3994  | -0.468766 | -2.93197 | 5.00E-05 | 0.00624511 | yes | 0.72258239 |
| XLOC_01752 | XLOC_01752 | IRAK2     | chr3:102065 ctr | R1881 | OK | 13.912  | 10.0338  | -0.471464 | -2.6368  | 5.00E-05 | 0.00624511 | yes | 0.72123234 |
| XLOC_01374 | XLOC_01374 | TMEM238   | chr19:55890 ctr | R1881 | OK | 13.7354 | 9.88851  | -0.474076 | -2.78377 | 0.0003   | 0.0279078  | yes | 0.71992773 |
| XLOC_01273 | XLOC_01273 | FOSB      | chr19:45971 ctr | R1881 | OK | 7.84235 | 5.64591  | -0.474081 | -2.54774 | 5.00E-05 | 0.00624511 | yes | 0.71992524 |
| XLOC_00213 | XLOC_00213 | KIF21B    | chr1:200938 ctr | R1881 | OK | 2.34329 | 1.68217  | -0.478211 | -2.40746 | 5.00E-05 | 0.00624511 | yes | 0.71786726 |
| XLOC_02185 | XLOC_02185 | TNFAIP3   | chr6:138144 ctr | R1881 | OK | 34.0069 | 24.412   | -0.478235 | -2.83361 | 5.00E-05 | 0.00624511 | yes | 0.71785532 |
| XLOC_02101 | XLOC_02101 | FAT2      | chr5:150883 ctr | R1881 | OK | 1.18943 | 0.853501 | -0.478802 | -2.13264 | 5.00E-05 | 0.00624511 | yes | 0.71757324 |

|            |            |         |                 |       |    |          |          |           |          |          |            |     |            |
|------------|------------|---------|-----------------|-------|----|----------|----------|-----------|----------|----------|------------|-----|------------|
| XLOC_01328 | XLOC_01328 | NOTCH3  | chr19:15270:ctr | R1881 | OK | 1.03041  | 0.73933  | -0.47893  | -2.02616 | 5.00E-05 | 0.00624511 | yes | 0.71750958 |
| XLOC_02557 | XLOC_02557 | RDH10   | chr8:742068:ctr | R1881 | OK | 38.2581  | 27.4303  | -0.479995 | -3.34508 | 5.00E-05 | 0.00624511 | yes | 0.71698011 |
| XLOC_00105 | XLOC_00105 | G0S2    | chr1:209848:ctr | R1881 | OK | 212.43   | 152.19   | -0.481112 | -3.51568 | 5.00E-05 | 0.00624511 | yes | 0.71642521 |
| XLOC_00566 | XLOC_00566 | NR4A1   | chr12:52416:ctr | R1881 | OK | 8.17034  | 5.83656  | -0.485279 | -2.42729 | 5.00E-05 | 0.00624511 | yes | 0.71435891 |
| XLOC_02604 | XLOC_02604 | GEM     | chr8:952614:ctr | R1881 | OK | 2.59086  | 1.84815  | -0.487353 | -1.80479 | 0.00025  | 0.0246699  | yes | 0.71333269 |
| XLOC_00173 | XLOC_00173 | EPS8L3  | chr1:110292:ctr | R1881 | OK | 2.88908  | 2.05866  | -0.488904 | -1.83969 | 0.00015  | 0.0162373  | yes | 0.71256622 |
| XLOC_02588 | XLOC_02588 | DUSP4   | chr8:291905:ctr | R1881 | OK | 20.5293  | 14.5954  | -0.492172 | -3.06795 | 5.00E-05 | 0.00624511 | yes | 0.71095394 |
| XLOC_02040 | XLOC_02040 | CSF2    | chr5:131409:ctr | R1881 | OK | 8.04279  | 5.69237  | -0.498668 | -2.3906  | 0.0001   | 0.0112333  | yes | 0.70775994 |
| XLOC_01106 | XLOC_01106 | NOS2    | chr17:26083:ctr | R1881 | OK | 3.56256  | 2.52014  | -0.499408 | -2.29604 | 5.00E-05 | 0.00624511 | yes | 0.707397   |
| XLOC_00513 | XLOC_00513 | MMP1    | chr11:10265:ctr | R1881 | OK | 16.7124  | 11.8045  | -0.501582 | -2.77003 | 5.00E-05 | 0.00624511 | yes | 0.70633182 |
| XLOC_00654 | XLOC_00654 | TBX3    | chr12:11510:ctr | R1881 | OK | 1.53535  | 1.08306  | -0.503458 | -2.11892 | 5.00E-05 | 0.00624511 | yes | 0.70541394 |
| XLOC_01635 | XLOC_01635 | PREX1   | chr20:47240:ctr | R1881 | OK | 0.759479 | 0.534727 | -0.506208 | -1.85871 | 0.0003   | 0.0279078  | yes | 0.7040706  |
| XLOC_00624 | XLOC_00624 | RND1    | chr12:49250:ctr | R1881 | OK | 13.9391  | 9.75772  | -0.514518 | -2.89748 | 5.00E-05 | 0.00624511 | yes | 0.70002677 |
| XLOC_02666 | XLOC_02666 | PAPPA   | chr9:118916:ctr | R1881 | OK | 14.5785  | 10.2036  | -0.514761 | -3.21108 | 5.00E-05 | 0.00624511 | yes | 0.69990887 |
| XLOC_00892 | XLOC_00892 | SEMA7A  | chr15:74701:ctr | R1881 | OK | 73.0406  | 50.8428  | -0.522655 | -3.07904 | 5.00E-05 | 0.00624511 | yes | 0.69608964 |
| XLOC_00295 | XLOC_00295 | UNC5B   | chr10:72972:ctr | R1881 | OK | 2.64059  | 1.83404  | -0.525838 | -2.66999 | 5.00E-05 | 0.00624511 | yes | 0.69455556 |
| XLOC_01348 | XLOC_01348 | POU2F2  | chr19:42590:ctr | R1881 | OK | 3.28996  | 2.27471  | -0.532386 | -1.72198 | 0.00045  | 0.0379125  | yes | 0.6914103  |
| XLOC_01588 | XLOC_01588 | SLC24A3 | chr20:19193:ctr | R1881 | OK | 1.05851  | 0.727021 | -0.541972 | -1.92288 | 0.0003   | 0.0279078  | yes | 0.68683145 |
| XLOC_01504 | XLOC_01504 | IL1B    | chr2:113587:ctr | R1881 | OK | 24.3688  | 16.7113  | -0.544211 | -3.44161 | 5.00E-05 | 0.00624511 | yes | 0.68576634 |
| XLOC_02511 | XLOC_02511 | SHH     | chr7:155592:ctr | R1881 | OK | 9.50163  | 6.49915  | -0.547922 | -2.07678 | 0.0001   | 0.0112333  | yes | 0.68400463 |
| XLOC_00211 | XLOC_00211 | PTGS2   | chr1:186640:ctr | R1881 | OK | 36.1561  | 24.3845  | -0.568272 | -2.88617 | 5.00E-05 | 0.00624511 | yes | 0.6744241  |
| XLOC_00513 | XLOC_00513 | MMP10   | chr11:10264:ctr | R1881 | OK | 6.64384  | 4.4329   | -0.583767 | -2.98292 | 5.00E-05 | 0.00624511 | yes | 0.66721933 |
| XLOC_01618 | XLOC_01618 | FERMT1  | chr20:60554:ctr | R1881 | OK | 5.93451  | 3.92992  | -0.59463  | -3.3902  | 5.00E-05 | 0.00624511 | yes | 0.66221427 |
| XLOC_02641 | XLOC_02641 | IL33    | chr9:621576:ctr | R1881 | OK | 39.9279  | 26.4257  | -0.595455 | -3.73729 | 5.00E-05 | 0.00624511 | yes | 0.66183569 |
| XLOC_02138 | XLOC_02138 | CD83    | chr6:141174:ctr | R1881 | OK | 6.54094  | 4.31136  | -0.601355 | -2.95106 | 5.00E-05 | 0.00624511 | yes | 0.6591346  |
| XLOC_01637 | XLOC_01637 | CYP24A1 | chr20:52769:ctr | R1881 | OK | 12.5182  | 8.24744  | -0.60201  | -3.33454 | 5.00E-05 | 0.00624511 | yes | 0.65883541 |
| XLOC_02491 | XLOC_02491 | VGF     | chr7:100805:ctr | R1881 | OK | 28.1682  | 18.5523  | -0.602471 | -3.73829 | 5.00E-05 | 0.00624511 | yes | 0.65862492 |
| XLOC_02661 | XLOC_02661 | NR4A3   | chr9:102584:ctr | R1881 | OK | 0.647143 | 0.424622 | -0.607906 | -1.94859 | 0.0002   | 0.0207686  | yes | 0.65614838 |
| XLOC_02176 | XLOC_02176 | PRDM1   | chr6:106534:ctr | R1881 | OK | 0.642805 | 0.420193 | -0.613329 | -1.98567 | 5.00E-05 | 0.00624511 | yes | 0.65368659 |
| XLOC_01374 | XLOC_01374 | IL11    | chr19:55875:ctr | R1881 | OK | 30.7699  | 20.1137  | -0.61334  | -3.5269  | 5.00E-05 | 0.00624511 | yes | 0.6536816  |
| XLOC_00194 | XLOC_00194 | NES     | chr1:156638:ctr | R1881 | OK | 1.13056  | 0.738657 | -0.614064 | -2.39698 | 5.00E-05 | 0.00624511 | yes | 0.65335364 |
| XLOC_00705 | XLOC_00705 | GJB2    | chr13:20761:ctr | R1881 | OK | 1.22024  | 0.7959   | -0.616509 | -2.04692 | 0.00035  | 0.0315725  | yes | 0.65224731 |
| XLOC_01504 | XLOC_01504 | IL1A    | chr2:113531:ctr | R1881 | OK | 8.77963  | 5.72259  | -0.61749  | -3.60671 | 5.00E-05 | 0.00624511 | yes | 0.65180395 |
| XLOC_01054 | XLOC_01054 | CSF3    | chr17:38171:ctr | R1881 | OK | 62.14    | 40.3299  | -0.623673 | -3.60284 | 5.00E-05 | 0.00624511 | yes | 0.64901647 |
| XLOC_01409 | XLOC_01409 | CCDC85A | chr2:564022:ctr | R1881 | OK | 0.942823 | 0.607176 | -0.634873 | -1.83637 | 0.00035  | 0.0315725  | yes | 0.6439975  |
| XLOC_01585 | XLOC_01585 | BMP2    | chr20:67482:ctr | R1881 | OK | 16.406   | 10.277   | -0.674805 | -3.85285 | 5.00E-05 | 0.00624511 | yes | 0.62641688 |
| XLOC_02405 | XLOC_02405 | IL6     | chr7:227667:ctr | R1881 | OK | 82.3572  | 50.3454  | -0.710036 | -4.17186 | 5.00E-05 | 0.00624511 | yes | 0.61130489 |
| XLOC_01429 | XLOC_01429 | IL1RN   | chr2:113875:ctr | R1881 | OK | 3.45539  | 2.08871  | -0.726239 | -2.70252 | 5.00E-05 | 0.00624511 | yes | 0.60447769 |
| XLOC_01351 | XLOC_01351 | LYPD3   | chr19:43964:ctr | R1881 | OK | 1.95109  | 1.17783  | -0.728146 | -2.51688 | 0.0001   | 0.0112333  | yes | 0.6036792  |
| XLOC_00944 | XLOC_00944 | NKD1    | chr16:50582:ctr | R1881 | OK | 0.98129  | 0.592252 | -0.728469 | -3.1328  | 5.00E-05 | 0.00624511 | yes | 0.60354406 |
| XLOC_02718 | XLOC_02718 | TNFSF15 | chr9:117546:ctr | R1881 | OK | 4.53978  | 2.72732  | -0.735139 | -4.06115 | 5.00E-05 | 0.00624511 | yes | 0.60076014 |
| XLOC_01841 | XLOC_01841 | PDZRN3  | chr3:734316:ctr | R1881 | OK | 0.411603 | 0.239149 | -0.783343 | -1.96513 | 0.00025  | 0.0246699  | yes | 0.5810189  |
| XLOC_01640 | XLOC_01640 | LAMA5   | chr20:60878:ctr | R1881 | OK | 111.448  | 64.6101  | -0.786534 | -4.11986 | 0.0003   | 0.0279078  | yes | 0.5797352  |
| XLOC_01511 | XLOC_01511 | NR4A2   | chr2:157180:ctr | R1881 | OK | 4.85541  | 2.70029  | -0.84648  | -4.07437 | 5.00E-05 | 0.00624511 | yes | 0.55614    |

|            |            |            |                 |       |    |          |           |           |           |          |            |     |            |
|------------|------------|------------|-----------------|-------|----|----------|-----------|-----------|-----------|----------|------------|-----|------------|
| XLOC_01534 | XLOC_01534 | PID1       | chr2:229888 ctr | R1881 | OK | 0.817493 | 0.437185  | -0.902961 | -2.25706  | 5.00E-05 | 0.00624511 | yes | 0.534788   |
| XLOC_01825 | XLOC_01825 | TMEM158    | chr3:452659 ctr | R1881 | OK | 1.065    | 0.514501  | -1.0496   | -2.8977   | 5.00E-05 | 0.00624511 | yes | 0.48310209 |
| XLOC_01764 | XLOC_01764 | TMEM42     | chr3:449028 ctr | R1881 | OK | 74.2025  | 33.2507   | -1.15808  | -18.9585  | 5.00E-05 | 0.00624511 | yes | 0.4481085  |
| XLOC_01122 | XLOC_01122 | KRT15      | chr17:39669 ctr | R1881 | OK | 0.977497 | 0.435521  | -1.16635  | -2.85063  | 5.00E-05 | 0.00624511 | yes | 0.44554714 |
| XLOC_01624 | XLOC_01624 | LOC284801  | chr20:26167 ctr | R1881 | OK | 8.76236  | 3.53634   | -1.30906  | -3.14677  | 5.00E-05 | 0.00624511 | yes | 0.40358375 |
| XLOC_01582 | XLOC_01582 | NOP56      | chr20:26331 ctr | R1881 | OK | 142.947  | 57.6166   | -1.31093  | -8.56466  | 5.00E-05 | 0.00624511 | yes | 0.40306097 |
| XLOC_02592 | XLOC_02592 | RNF170     | chr8:427047 ctr | R1881 | OK | 17.1742  | 6.68692   | -1.36083  | -7.89059  | 5.00E-05 | 0.00624511 | yes | 0.38935822 |
| XLOC_02571 | XLOC_02571 | PSCA       | chr8:143751 ctr | R1881 | OK | 0.950434 | 0.360357  | -1.39916  | -1.99668  | 0.0003   | 0.0279078  | yes | 0.37914984 |
| XLOC_02696 | XLOC_02696 | RMRP       | chr9:356577 ctr | R1881 | OK | 358.152  | 115.969   | -1.62683  | -24.3992  | 5.00E-05 | 0.00624511 | yes | 0.3237989  |
| XLOC_00778 | XLOC_00778 | RPPH1      | chr14:20811 ctr | R1881 | OK | 254.912  | 75.5082   | -1.75529  | -17.0186  | 5.00E-05 | 0.00624511 | yes | 0.29621364 |
| XLOC_00991 | XLOC_00991 | LINC00273  | chr16:33961 ctr | R1881 | OK | 2.10315  | 0.605431  | -1.79651  | -4.65271  | 5.00E-05 | 0.00624511 | yes | 0.28787013 |
| XLOC_01455 | XLOC_01455 | IGFBP2     | chr2:217498 ctr | R1881 | OK | 1.18615  | 0.318427  | -1.89724  | -3.93101  | 5.00E-05 | 0.00624511 | yes | 0.26845646 |
| XLOC_01593 | XLOC_01593 | BPIFB1     | chr20:31870 ctr | R1881 | OK | 1.6374   | 0.41707   | -1.97305  | -4.41447  | 5.00E-05 | 0.00624511 | yes | 0.25471397 |
| XLOC_00188 | XLOC_00188 | S100A8     | chr1:153362 ctr | R1881 | OK | 3.3999   | 0.802348  | -2.08319  | -5.04615  | 5.00E-05 | 0.00624511 | yes | 0.23599202 |
| XLOC_01909 | XLOC_01909 | S100P      | chr4:669556 ctr | R1881 | OK | 2.03836  | 0.474783  | -2.10207  | -3.80765  | 0.00055  | 0.0446525  | yes | 0.23292381 |
| XLOC_01361 | XLOC_01361 | SLC6A16    | chr19:49792 ctr | R1881 | OK | 8.23971  | 1.36574   | -2.59291  | -4.41653  | 5.00E-05 | 0.00624511 | yes | 0.16575106 |
| XLOC_01122 | XLOC_01122 | KRT17      | chr17:39775 ctr | R1881 | OK | 9.5693   | 1.51406   | -2.65999  | -10.0053  | 5.00E-05 | 0.00624511 | yes | 0.15822067 |
| XLOC_01256 | XLOC_01256 | FXD3       | chr19:35606 ctr | R1881 | OK | 1.0813   | 0.158829  | -2.76722  | -1.90676  | 5.00E-05 | 0.00624511 | yes | 0.14688714 |
| XLOC_01828 | XLOC_01828 | COL7A1     | chr3:486015 ctr | R1881 | OK | 61.6082  | 8.90861   | -2.78985  | -17.9755  | 5.00E-05 | 0.00624511 | yes | 0.14460106 |
| XLOC_00521 | XLOC_00521 | TRIM29     | chr11:11998 ctr | R1881 | OK | 0.499896 | 0.0683364 | -2.8709   | -4.11938  | 5.00E-05 | 0.00624511 | yes | 0.13670141 |
| XLOC_01122 | XLOC_01122 | KRT16      | chr17:39766 ctr | R1881 | OK | 2.99442  | 0.282418  | -3.40638  | -7.11907  | 5.00E-05 | 0.00624511 | yes | 0.09431428 |
| XLOC_01295 | XLOC_01295 | CACNG8     | chr19:54466 ctr | R1881 | OK | 8.87592  | 0.820876  | -3.43466  | -4.60501  | 5.00E-05 | 0.00624511 | yes | 0.09248351 |
| XLOC_01122 | XLOC_01122 | KRT14      | chr17:39738 ctr | R1881 | OK | 4.52669  | 0.407427  | -3.47384  | -8.45889  | 5.00E-05 | 0.00624511 | yes | 0.09000569 |
| XLOC_02658 | XLOC_02658 | MIRLET7D   | chr9:969388 ctr | R1881 | OK | 22.5843  | 1.95921   | -3.52698  | -8.98618  | 5.00E-05 | 0.00624511 | yes | 0.08675075 |
| XLOC_00629 | XLOC_00629 | KRT4       | chr12:53200 ctr | R1881 | OK | 0.846124 | 0.0695988 | -3.60374  | -4.70817  | 5.00E-05 | 0.00624511 | yes | 0.08225573 |
| XLOC_01122 | XLOC_01122 | KRT13      | chr17:39657 ctr | R1881 | OK | 2.25904  | 0.185339  | -3.60747  | -4.95308  | 5.00E-05 | 0.00624511 | yes | 0.08204334 |
| XLOC_00655 | XLOC_00655 | CIT        | chr12:12012 ctr | R1881 | OK | 9.58149  | 0.77942   | -3.61978  | -4.62145  | 5.00E-05 | 0.00624511 | yes | 0.08134627 |
| XLOC_01153 | XLOC_01153 | MIR4740    | chr17:79369 ctr | R1881 | OK | 24.037   | 1.55027   | -3.95467  | -5.28688  | 5.00E-05 | 0.00624511 | yes | 0.06449495 |
| XLOC_00170 | XLOC_00170 | MIR137,MIR | chr1:984535 ctr | R1881 | OK | 4.55085  | 0.0630653 | -6.17315  | -0.733388 | 5.00E-05 | 0.00624511 | yes | 0.01385788 |

Red fonts denote DEGs that overlap with those found in prostate cells upon R1881 treatment.
